# Supplementary material for: A Meta-Analysis of the Analgesic Efficacy of Single-Doses of Ibuprofen Compared to Traditional Non-Opioid Analgesics Following Third Molar Surgery
Source: MDPI journal article supplement (doi:10.3390/ph14040360), 2021-04-14
Supplement: s1 [file s1]

# A Meta-Analysis of the Analgesic Efficacy of Single-Doses of Ibuprofen Compared to Traditional Non-Opioid Analgesics Following Third Molar Surgery

Lorenzo Franco-de la Torre <sup>1</sup>, Norma Patricia Figueroa-Fernández <sup>2</sup>, Diana Laura Franco-González <sup>1</sup>, Ángel Josabad Alonso-Castro <sup>3</sup>, Federico Rivera-Luna <sup>2</sup> and Mario Alberto Isiordia-Espinoza <sup>1,\*</sup>

- 1 Instituto de Investigación en Ciencias Médicas, Departamento de Clínicas, División de Ciencias Biomédicas, Centro Universitario de los Altos, Universidad de Guadalajara, Tapatitlán de Morelos, 47620, Mexico; lorfran8888@hotmail.com (L.F.-d.T.); diana.franco5288@alumnos.udg.mx (D.L.F.-G.)  
 2 Departamento de Cirugía Oral y Maxilofacial, Facultad de Odontología, Universidad Autónoma de Baja California, Campus Mexicali, 21040, Mexico; nfigueroa@uabc.edu.mx (N.P.F.-F.); rivera\_l03@hotmail.com (F.R.-L.)  
 3 Departamento de Farmacia, División de Ciencias Naturales y Exactas, Universidad de Guanajuato, 36250, Mexico; angeljosabad@hotmail.com  
 \* Correspondence: mario.isiordia162@yahoo.com; Tel.: 52-378-119-5786.

**Table S1.** Features summary of the high-quality studies.

| First author, study design<br>and, and analgesic strategy | Treatments (n)                                            | Patients, evaluation period,<br>and number of molars<br>extracted | Evaluation of the clinical<br>efficacy | Adverse effects           | Conclusion                    |
|-----------------------------------------------------------|-----------------------------------------------------------|-------------------------------------------------------------------|----------------------------------------|---------------------------|-------------------------------|
| Ahlström et al., 1993                                     | Group A: Ibuprofen 400 mg (n=32).                         | Healthy patients.                                                 | Pain was evaluated by VAS              | Diclofenac presented a    | Ibuprofen and diclofenac      |
| Randomized, double-blind,<br>parallel, clinical trial.    | Group B: Diclofenac 50 mg (n=35).                         | Assessment period was 6 h.                                        | at 20 and 40 minutes as well           | high incidence of adverse | produced similar pain relief- |
| Single-dose study.                                        | Group C: Placebo (n=30).                                  | A mandibular third molar                                          | as 1 to 6 post-surgical h.             | effects when compared to  | analgesia.                    |
| Post-operative analgesia.                                 | All treatments were administered using the<br>oral route. | removed.                                                          |                                        | ibuprofen and placebo     |                               |

|                               |                                            |                              |                                |                              |                               |
|-------------------------------|--------------------------------------------|------------------------------|--------------------------------|------------------------------|-------------------------------|
| Bakshi et al., 1994.          | Group A: Ibuprofen 400 mg (n=80).          | Healthy patients.            | Pain at 20 and 40 minutes, as  | Similar adverse effect were  | Diclofenac produced rapid     |
| Randomized, double-blind,     | Group B: Diclofenac 50 mg (n=83).          | Assessment period was 6 h.   | well as 1 to 6 post-surgical h | observed for all treatments  | onset of analgesic effect in  |
| parallel, clinical trial.     | Group C: Placebo (n=82).                   | One mandibular third molar   | with VAS, and VRS. Other       |                              | comparison with ibuprofen     |
| Single-dose study.            | All treatments were administered using the | extracted.                   | variables were TOTPAR-6,       |                              | and placebo.                  |
| Post-operative analgesia.     | oral route.                                |                              | and global evaluation of       |                              |                               |
|                               |                                            |                              | treatments.                    |                              |                               |
| Christensen et al., 2017.     | Group A: Ibuprofen 600 mg (n=109).         | Good health patients.        | Pain relief, PID, SPID, time   | Eleven patients receiving    | Ibuprofen presented faster    |
| Randomized, double-blind,     | Group B: Naproxen sodium 220 mg (n=58).    | The evaluation period was 24 | to confirmed first             | ibuprofen and six patients   | onset and superior analgesia  |
| parallel, clinical trial.     | Group C: Placebo (n=29).                   | h.                           | perceptible relief, time to    | taking naproxen sodium       | than naproxen sodium.         |
| Single- and multi-dose study. | (Clinical study 1).                        | A third molar surgery.       | meaningful pain relief, time   | had adverse effects.         |                               |
| Post-operative analgesia.     |                                            |                              | to treatment failure, and      |                              |                               |
|                               |                                            |                              | percentage of treatment        |                              |                               |
|                               |                                            |                              | failures.                      |                              |                               |
| Forbes et al., 1991.          | Group A: Ibuprofen 400 mg (n=37).          | Patients without clinical    | PID-4, PID-8, SPID-4, SPID-    | Similar number of adverse    | Bromfenac 25 mg and           |
| Randomized, double-blind,     | Group B: Aspirin 650 mg (n=41).            | significand condition.       | 8, peak PID score 4 and 8 h,   | effects were observed in all | ibuprofen 400 mg were         |
| parallel, clinical trial.     | Group C: Bromfenac 5 mg (n=39).            | One to four third molar      | pain relief, TOTPAR-4,         | groups.                      | significantly superior to the |
| Single-dose study.            | Group D: Bromfenac 10 mg (n=43).           | extractions.                 | TOTPAR-8 peak pain relief,     |                              | other active treatments.      |
| Post-operative analgesia.     | Group E: Bromfenac 25 mg (n=42).           | Patients were evaluated      | total hours of 50% relief, and |                              |                               |
|                               | Group F: Placebo (n=39).                   | during 8 h after surgery.    | overall evaluation.            |                              |                               |

|                               |                                    |                             |                             |                            |                               |
|-------------------------------|------------------------------------|-----------------------------|-----------------------------|----------------------------|-------------------------------|
| Forbes et al., 1992.          | Group A: Ibuprofen 400 mg (n=38).  | Patients without clinical   | PID, SPID, peak PID score,  | Similar frequency of       | Bromfenac 100 mg was more     |
| Randomized, double-blind,     | Group B: Aspirin 650 mg (n=38).    | significand condition.      | pain relief, TOTPAR-8, peak | adverse effects were       | effective than ibuprofen.     |
| parallel, clinical trial.     | Group C: Bromfenac 10 mg (n=43).   | One to four third molar     | pain relief, total hours of | observed in all groups.    |                               |
| Single-dose study.            | Group D: Bromfenac 25 mg (n=41).   | extractions.                | 50% relief, and overall     |                            |                               |
| Post-operative analgesia.     | Group E: Bromfenac 50 mg (n=42).   | Patients were evaluated     | evaluation.                 |                            |                               |
|                               | Group F: Bromfenac 100 mg (n=40)   | during 8 h after surgery.   |                             |                            |                               |
|                               | Placebo (n=38).                    |                             |                             |                            |                               |
| Hersh, et al., 1993.          | Group A: Ibuprofen 200 mg (n=51).  | Patients with good health.  | Pain intensity evaluation,  | Similar number of adverse  | The high dose of ibuprofen    |
| Randomized, double-blind,     | Group B: Ibuprofen 400 mg (n=49).  | One or more third molar     | PID, SPID, peak PID score,  | effects were recorded.     | and meclofenamate were        |
| parallel, clinical trial.     | Group C: Meclofenamate 50 (n=51).  | surgeries.                  | pain relief, TOTPAR-8, peak |                            | most effective than the lower |
| Single- and multi-dose study. | Group D: Meclofenamate 100 (n=52). | Patients were evaluated 8 h | pain relief, overall        |                            | doses of these agents after   |
| Post-operative analgesia.     | Group E: Placebo (n=51).           | following surgery.          | evaluation, and time to     |                            | third molar surgery.          |
|                               |                                    |                             | remedication.               |                            |                               |
| Hersh, et al., 2000.          | Group A: Ibuprofen 200 mg.         | Patients with good health.  | TOTPAR-2, TOTPAR-6,         | All treatments were well   | Ibuprofen (200 and 400 mg)    |
| Randomized, double-blind,     | Group B: Ibuprofen 400 mg.         | One or more third molar     | SPID-2, SPID-6, onset of    | tolerated, with no serious | was superior to               |
| parallel, clinical trial.     | Group C: Acetaminophen 1000 mg.    | surgeries.                  | analgesia, and peak         | side effects reported.     | acetaminophen.                |
| Single- and multi-dose study. | Group D: Placebo.                  | Patients were evaluated 6 h | analgesia effect,           |                            |                               |
| Post-operative analgesia.     |                                    | following surgery.          | remedication, and overall   |                            |                               |
|                               |                                    |                             | evaluation.                 |                            |                               |

|                           |                                           |                              |                              |                             |                             |
|---------------------------|-------------------------------------------|------------------------------|------------------------------|-----------------------------|-----------------------------|
| Joshi et al., 2004.       | Group A: Ibuprofen 600 mg (n=31).         | Patients ASA I and II.       | Pain intensity was assessed  | There was no significant    | There was not difference    |
| Randomized, double-blind, | Group B: Diclofenac 100 mg (n=29).        | A third molar extraction.    | using the VAS and VRS.       | difference among the        | between active treatments.  |
| parallel, clinical trial. | Group C: Paracetamol 1000 mg and Codeine  | The evaluation period was 24 | Time for the first analgesic | groups.                     |                             |
| Single-dose study.        | 60 mg (n=30).                             | h.                           | and number of analgesic in   |                             |                             |
| Pre-operative analgesia.  | Group D: Placebo (n=29).                  |                              | the post-operative period    |                             |                             |
|                           |                                           |                              | were evaluated.              |                             |                             |
| Mehlich et al., 2010a.    | Group A: Ibuprofen 400 mg (n=69).         | Healthy patients.            | SPIDR-4, SPRID-6, SPRID-8,   | Similar frequency of        | Ibuprofen/acetaminophen     |
| Randomized, double-blind, | Group B: Acetaminophen 1000 mg (n=34).    | Two or more third molar      | TOTPAR-4, TOTPAR-6,          | adverse effects between all | combination produced better |
| parallel, clinical trial. | Group C: Ibuprofen 400 mg/acetaminophen   | surgeries.                   | TOTPAR-6, re-medication,     | treatments.                 | analgesia than ibuprofen or |
| Single-dose study.        | 1000 mg (n=67).                           | Assessment period was 8 h.   | and global evaluation.       |                             | acetaminophen alone.        |
| Post-operative analgesia. | Group D: Ibuprofen 200 mg / acetaminophen |                              |                              |                             |                             |
|                           | 500 mg (n=33).                            |                              |                              |                             |                             |
|                           | Group E: Placebo (n=31).                  |                              |                              |                             |                             |
| Mehlich et al., 2010b.    | Group A: Ibuprofen 400 mg (n=74).         | Healthy patients.            | SPID-4, SPID-6, SPID-8,      | There was no significant    | Ibuprofen/acetaminophen     |
| Randomized, double-blind, | Group B: Ibuprofen 200 mg (n=75).         | At least 3 lower third molar | TOTPAR-4, TOTPAR-6,          | difference among the        | mixture was more effective  |
| parallel, clinical trial. | Group C: Acetaminophen 1000 mg (n=74).    | surgeries.                   | TOTPAR-6, re-medication,     | groups.                     | than either drug alone.     |
| Single-dose study.        | Group D: Acetaminophen 500 mg (n=76).     | Assessment period was 8 h.   | and overall assessment of    |                             |                             |
| Post-operative analgesia. | Group E: Ibuprofen 400 and acetaminophen  |                              | study medication.            |                             |                             |
|                           | 1000 mg (n=149).                          |                              |                              |                             |                             |

|                           |                                                             |                               |                             |                           |                               |
|---------------------------|-------------------------------------------------------------|-------------------------------|-----------------------------|---------------------------|-------------------------------|
|                           | Group F: Ibuprofen 200 mg and acetaminophen 500 mg (n=143). |                               |                             |                           |                               |
|                           | Group G: Ibuprofen 100 mg and acetaminophen 250 mg (n=71).  |                               |                             |                           |                               |
|                           | Group H: Placebo (n=73).                                    |                               |                             |                           |                               |
| Morrison et al., 2000.    | Group A: Ibuprofen 400 mg (n=127).                          | Healthy patients and patients | TOTPAR, onset of analgesia, | Adverse effects of        | Rofecoxib provides analgesic  |
| Randomized, double-blind, | Group B: Naproxen sodium 550 mg (n=140).                    | with controlled systemic      | and peak analgesia effect,  | ibuprofen, naproxen       | efficacy similar a naproxen   |
| parallel, clinical trial. | Group C: Placebo (n=275).                                   | disease.                      | and overall evaluation.     | sodium, and placebo were  | sodium.                       |
| Single-dose study.        |                                                             | At least one mandibular third |                             | no shown.                 |                               |
| Post-operative analgesia. |                                                             | molar surgery.                |                             |                           |                               |
|                           |                                                             | The evaluation was done       |                             |                           |                               |
|                           |                                                             | through 24 hours.             |                             |                           |                               |
| Olson et al., 2001.       | Group A: Ibuprofen 400 mg (n=67).                           | Healthy patients.             | PRID, TOTPAR-2, TOTPAR-     | According to the          | Ibuprofen was superior to all |
| Randomized, double-blind, | Group B: Ketoprofen 25 mg (n=67).                           | One or more third molar       | 6, SPID-2, SPID-6, SPRID-2, | treatments, the adverse   | treatments.                   |
| parallel, clinical trial. | Group C: Acetaminophen 1000 mg (n=66).                      | surgeries.                    | SPRID-6, and the patient's  | effects were next:        |                               |
| Single-dose study.        | Group D: Placebo (n=39).                                    | Duration of trial was 6 hours | overall evaluation of the   | 5.1% who received         |                               |
| Post-operative analgesia. |                                                             |                               | study medication.           | placebo.                  |                               |
|                           |                                                             |                               |                             | 7.5% in ketoprofen. 10.4% |                               |
|                           |                                                             |                               |                             | in ibuprofen              |                               |

|                           |                                     |                                 |                              |                           |                                |
|---------------------------|-------------------------------------|---------------------------------|------------------------------|---------------------------|--------------------------------|
|                           |                                     |                                 |                              | 15.2% in acetaminophen.   |                                |
| Planas et al., 1998.      | Group A: Ibuprofen 600 mg (n=74).   | Patients with sufficient mental | Pain was evaluated using     | There was no difference   | Metamizol 2000 mg was          |
| Randomized, double-blind, | Group B: Metamizol 1000 mg (n=75).  | status to complete the          | VAS and the verbal scale.    | between treatment groups. | superior to ibuprofen and      |
| parallel, clinical trial. | Group C: Metamizol 2000 mg (n=72).  | assessment                      | PID and SPID were            |                           | placebo for control of pain    |
| Single-dose study.        | Group D: Placebo (n=32).            | A third molar surgery.          | calculated.                  |                           | after surgery.                 |
| Post-operative analgesia. |                                     | Trial duration was 1 hour.      |                              |                           |                                |
| Seymour et al., 1998.     | Group A: Ibuprofeno 400 mg (n=76).  | Healthy patients or patients    | AUC pain, AUC pain relief,   | There was no difference   | Ibuprofen was better           |
| Randomized, double-blind, | Group B: Aceclofenac 150 mg (n=71). | with controlled systemic        | scape analgesic intake, and  | between treatment groups. | analgesic than aceclofenac for |
| parallel, clinical trial. | Group C: Placebo (n=70).            | disease.                        | overall evaluation.          |                           | management of pain after       |
| Single-dose study.        |                                     | One or more third molar         |                              |                           | oral surgery.                  |
| Post-operative analgesia. |                                     | extractions.                    |                              |                           |                                |
|                           |                                     | Patients were evaluated 6       |                              |                           |                                |
|                           |                                     | hours following surgery.        |                              |                           |                                |
| Seymour et al., 2000.     | Group A: Ibuprofen 200 mg (n=59).   | Healthy patients (ASA I).       | VAS, VRS, PID-1, SPID-1,     | Similar number of adverse | Ketoprofen was better than     |
| Randomized, double-blind, | Group B: Ketoprofen 12.5 mg (n=61). | One or more third molar         | peak PID score, pain relief, | effects were recorded.    | ibuprofen for control of pain. |
| parallel, clinical trial. | Group C: Placebo (n=60).            | removal.                        | AUC-4, AUC-6, TOTPAR-4,      |                           |                                |
| Single-dose study.        |                                     | Patients were evaluated 6       | TOTPAR-6, and peak pain      |                           |                                |
| Post-operative analgesia. |                                     | hours following surgery.        | relief.                      |                           |                                |







|                                               |                          |               |              |     |                        |                      |
|-----------------------------------------------|--------------------------|---------------|--------------|-----|------------------------|----------------------|
| -                                             | Seymour et al., 2000     | 5.34/5/59     | 8.47/5.18/61 | 120 | -3.13 (-4.95 to -1.31) | NA/0.0008/Ketoprofen |
| Total Pain Relief at 6 h Following Surgery    |                          |               |              |     |                        |                      |
| Ibuprofen 400 mg versus acetaminophen 1000 mg |                          |               |              |     |                        |                      |
| -                                             | Hersh et al., 2000       | 16.56/0.75/59 | 11.9/1.01/63 | 122 | 4.66 (4.35 to 4.97)    |                      |
| -                                             | Olson et al., 2001       | 17.42/5.7/67  | 13.3/7/66    | 133 | 4.12 (1.95 to 6.29)    |                      |
|                                               | Subtotal sample size (n) | 126           | 129          | 255 | 4.65 (4.34 to 4.96)    | 0%/0.00001/Ibuprofen |
| Ibuprofen 400 mg versus ketoprofen 25 mg      |                          |               |              |     |                        |                      |
| -                                             | Olson et al., 2001       | 17.42/5.7/67  | 15/6.2/67    | 134 | 2.42 (0.40 to 4.44)    | NA/0.02/Ibuprofen    |
| Ibuprofen 200 mg versus acetaminophen 1000 mg |                          |               |              |     |                        |                      |
| -                                             | Hersh et al., 2000       | 14.72/0.83/61 | 11.9/1.01/63 | 124 | 2.82 (2.50 to 3.14)    | NA/0.00001/Ibuprofen |
| Ibuprofen 200 mg versus ketoprofen 12.5 mg    |                          |               |              |     |                        |                      |
| -                                             | Seymour et al., 2000     | 6.43/6.7/59   | 9.78/6.9/61  | 120 | -3.35 (-5.78 to -0.92) | NA/0.007/Ibuprofen   |
| Total Pain Relief at 8 Post-Surgical Hours    |                          |               |              |     |                        |                      |
| Ibuprofen 400 mg versus meclofenamate 100 mg  |                          |               |              |     |                        |                      |

|                                                                                               |                    |               |               |     |                        |                          |
|-----------------------------------------------------------------------------------------------|--------------------|---------------|---------------|-----|------------------------|--------------------------|
| -                                                                                             | Hersh et al., 1993 | 12.02/1.56/49 | 10.48/1.26/52 | 101 | 1.54 (0.98 to 2.10)    | NA/0.00001/Ibuprofen     |
| Ibuprofen 400 mg versus meclofenamate 50 mg                                                   |                    |               |               |     |                        |                          |
| -                                                                                             | Hersh et al., 1993 | 12.02/1.56/49 | 6.8/1.07/51   | 100 | 5.22 (4.69 to 5.75)    | NA/0.00001/Ibuprofen     |
| Ibuprofen 200 mg versus meclofenamate 100 mg                                                  |                    |               |               |     |                        |                          |
| -                                                                                             | Hersh et al., 1993 | 9.2/1.6/51    | 10.48/1.26/52 | 103 | -1.28 (-1.84 to -0.72) | NA/0.00001/No difference |
| Ibuprofen 200 mg versus meclofenamate 50 mg                                                   |                    |               |               |     |                        |                          |
| -                                                                                             | Hersh et al., 1993 | 9.2/1.6/51    | 6.8/1.07/51   | 102 | 2.4 (1.87 to 2.93)     | NA/0.00001/Ibuprofen     |
| SD = Standard deviation; n = sample size; NA = Not applicable; * = Test for overall effect Z. |                    |               |               |     |                        |                          |
